# Supplementary material for: Assessing Prevalence and Unique Risk Factors of Suicidal Ideation among First-Year University Students in China Using a Unique Multidimensional University Personality Inventor
Source: MDPI journal article supplement (doi:10.3390/ijerph191710786), 2022-08-30
Supplement: s1 [file s1]

University personality inventory is a 60-item self-report measure assessing whether an individual usually experienced the described symptom during the past year. For each item, a score of 1 was given for “Yes”, and 0 was given for “No”. Lie scales include items 5, 20, 35, and 50, which check the positive aspects of the student's character. Students with a UPI total sum score above 20 or those who respond “yes” to item 25 (“Have an idea of wanting to die”) are identified and guided to arrange personal interviews with mental health professionals

#### University personality inventory

---

- |    |                                          |
|----|------------------------------------------|
| 1  | Poor appetite                            |
| 2  | Feel sick, stomachache                   |
| 3  | Easily have diarrhea or constipation     |
| 4  | Care about palpitation and pulse         |
| 6  | Full of dissatisfaction and complaints   |
| 7  | High expectation from parents            |
| 8  | My past and family is misfortune         |
| 9  | Over-worry about my future               |
| 10 | Do not like meeting others               |
| 11 | Feel that I am not myself                |
| 12 | Lack of enthusiasm and positivity        |
| 13 | Pessimistic                              |
| 14 | Distracted                               |
| 15 | Over-uneven in emotion                   |
| 16 | Frequent insomnia                        |
| 17 | Headache                                 |
| 18 | Ache in neck and shoulder                |
| 19 | Chest pain or feel oppressed             |
| 21 | Intolerance                              |
| 22 | Inclined to worry                        |
| 23 | Restless                                 |
| 24 | Irritable                                |
| 25 | Have idea of wanting to die              |
| 26 | No interest in anything                  |
| 27 | Declining memory                         |
| 28 | Lack of patience                         |
| 29 | Lack of judgment                         |
| 30 | Too dependent on others                  |
| 31 | Distressed by blushing                   |
| 32 | Stuttering, faltering voice              |
| 33 | Feel hot and cold                        |
| 34 | Concern about urination or sexual organs |
| 36 | Uneasy without reason                    |
| 37 | Feel uneasy when alone                   |
-

---

|    |                                           |
|----|-------------------------------------------|
| 38 | Lack of confidence                        |
| 39 | Irresolute about anything                 |
| 40 | Easily feel misunderstood                 |
| 41 | Lack faith in others                      |
| 42 | Over-suspicious                           |
| 43 | Unwilling to associate with others        |
| 44 | Feel self-abased                          |
| 45 | Catastrophizing                           |
| 46 | Physically exhausted                      |
| 47 | In cold sweat when I hurry                |
| 48 | Dizzy when I stand up                     |
| 49 | Have ever lost consciousness, cramp       |
| 51 | Over-rigid                                |
| 52 | Cannot give up repeating things           |
| 53 | Susceptible to dirtiness                  |
| 54 | Cannot get rid of meaningless idea        |
| 55 | Sense weird smell from myself             |
| 56 | Suspect others say something bad about me |
| 57 | Wary of others                            |
| 58 | Care about others' gaze                   |
| 59 | Feel others despise me                    |
| 60 | Sensitive emotions                        |

---
